# Supplementary material for: Low Concentrations of Silver Nanoparticles Inhibit Spore Germination and Disturb Gender Differentiation of Ceratopteris thalictroides (L.) Brongn
Source: MDPI journal article supplement (doi:10.3390/nano12101730), 2022-05-18
Supplement: s1 [file s1]

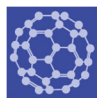

Supplementary Materials

# Low Concentrations of silver Nanoparticles Inhibit Spore Germination and Disturb Gender Differentiation of *Ceratopteris thalictroides* (L.) Brongn

Zhenwei Lu <sup>1,2,3</sup>, Liyan Yin <sup>1,4,\*</sup>, Wei Li <sup>3</sup> and Hong-Sheng Jiang <sup>3,\*</sup>

<sup>1</sup> Hainan Key Laboratory for Sustainable Utilization of Tropical Bioresources, School of Life Sciences, Hainan University, Haikou 570228, China; luzhenwei599@163.com

<sup>2</sup> Jiangsu Coastal Area Institute of Agricultural Sciences, Yancheng 224002, China

<sup>3</sup> Key Laboratory of Aquatic Botany and Watershed Ecology, Wuhan Botanical Garden, Chinese Academy of Sciences, Wuhan 430074, China; liwei@wbcas.cn

<sup>4</sup> One Health Institute, Hainan University, Haikou 570228, China

\* Correspondence: lyyin@163.com (L.Y.); jhs@wbcas.cn (H.S.J.); Tel: +86-898-6616-0721 (L.Y.); Tel: +86-27-8770-0855 (H.S.J.)

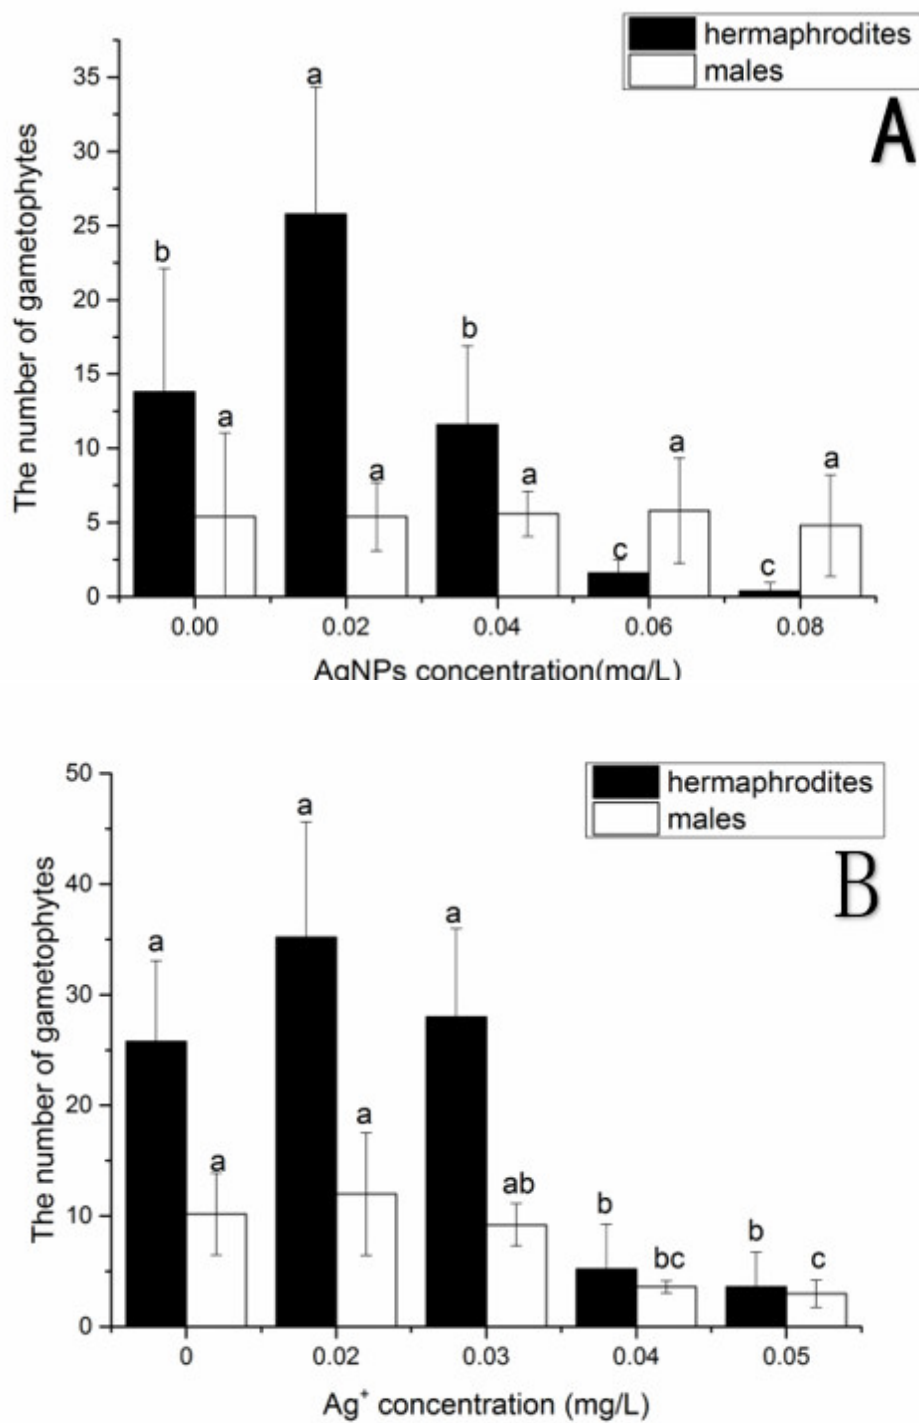

**Figure S1.** Effect of AgNPs (A) and Ag<sup>+</sup> (B) on the number of gametophytes of *Ceratopteris thalictroides* after 19d exposure. Data represent the mean  $\pm$  SD ( $n = 5$ ). Data with different letters are significantly different ( $p < 0.05$ ).

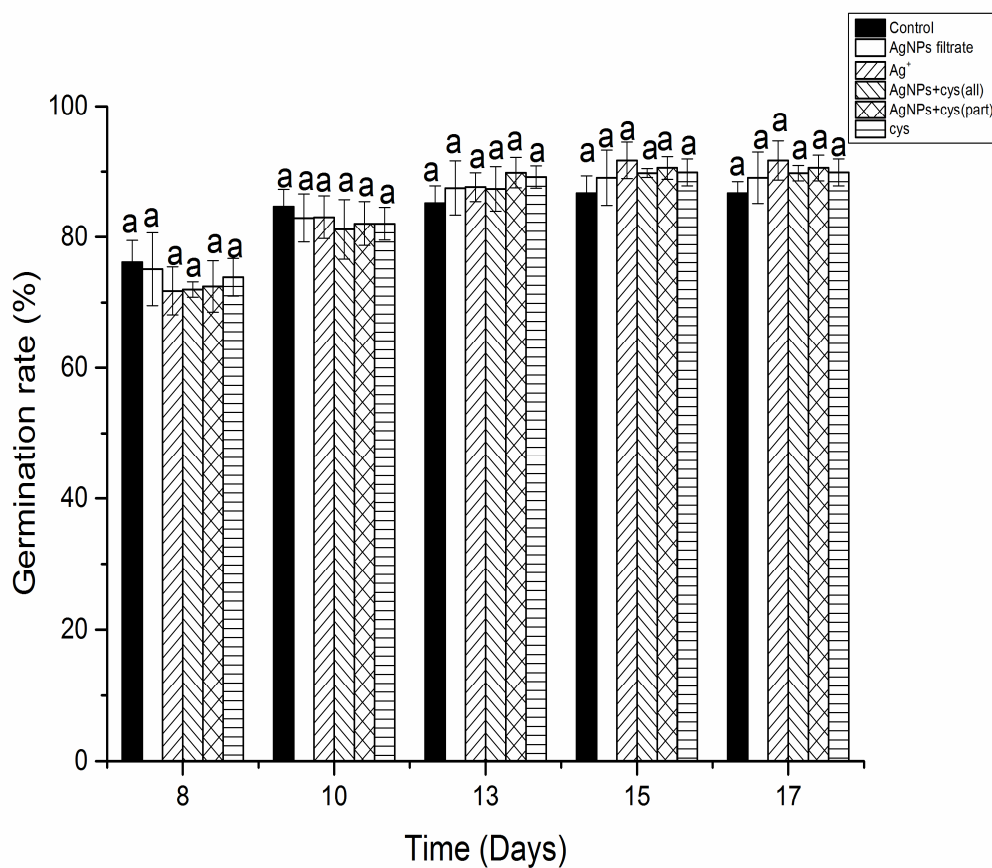

**Figure S2.** Effect of various comparison groups on the spore germination of *Ceratopteris thalictroides* after 17d exposure. (Control; AgNPs filtrate: 0.08 mg/L AgNPs filtrate; Ag<sup>+</sup>: 0.004 mg/L Ag<sup>+</sup>; AgNPs + cys(all): 0.08 mg/L AgNPs + 0.09 mg/L cys; AgNPs + cys(part): 0.08 mg/L AgNPs + 0.0045 mg/L cys; Cys: 0.09 mg/L cys) Data represent the mean  $\pm$  SD ( $n = 5$ ). Data with same letters were not significantly different ( $p = 0.05$ ).

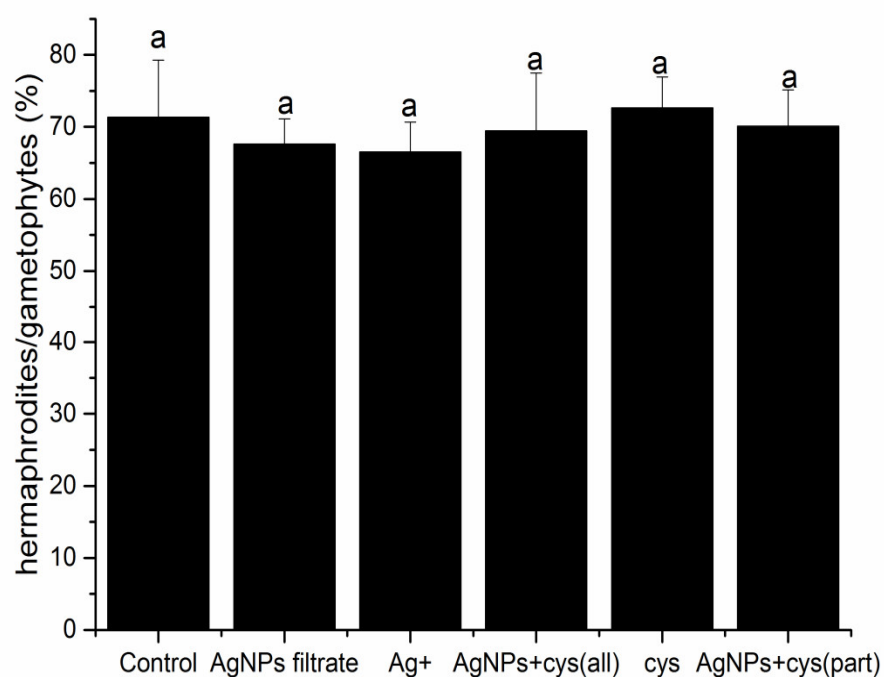

**Figure S3.** The proportion of hermaphrodites of various comparison groups after 19d exposure. (Control; AgNPs filtrate: 0.08 mg/L AgNPs filtrate; Ag<sup>+</sup>: 0.004 mg/L Ag<sup>+</sup>; AgNPs + cys(all): 0.08 mg/L AgNPs + 0.09 mg/L cys; Cys: 0.09 mg/L cys; AgNPs + cys(part): 0.08 mg/L AgNPs + 0.0045 mg/L cys) Data represent the mean  $\pm$  SD ( $n = 5$ ). Data with same letters were not significantly different ( $p = 0.05$ ).

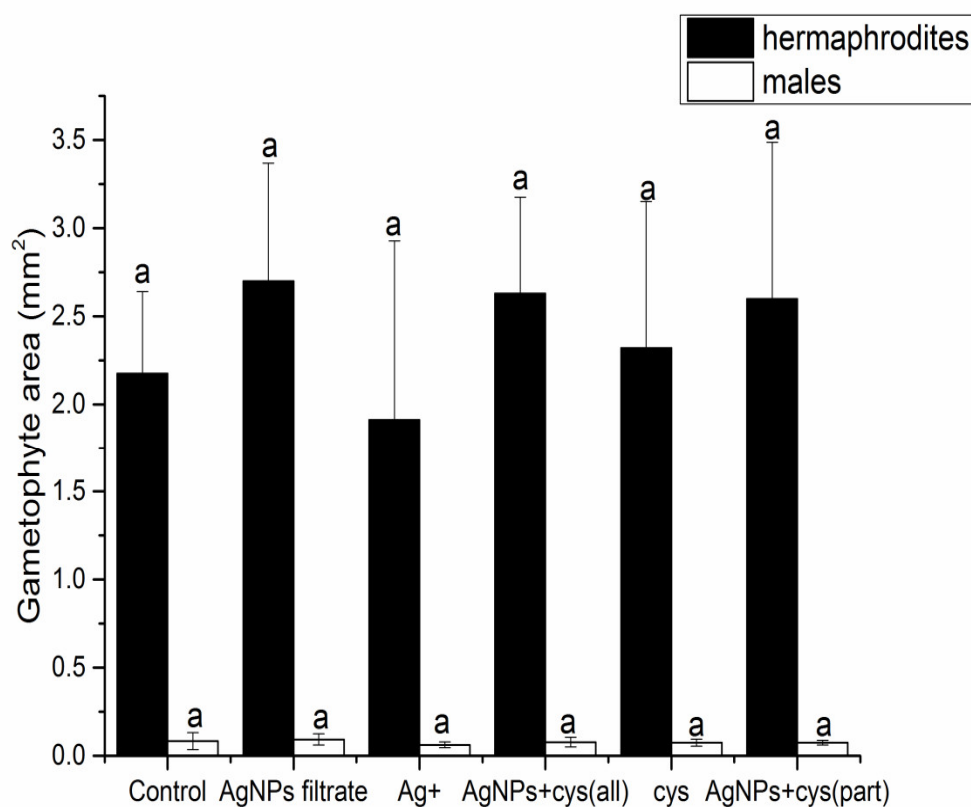

**Figure S4.** Effect of various comparison groups on area of male gametophytes and hermaphrodites of *Ceratopteris thalictroides* after 21d exposure. (Control; AgNPs filtrate: 0.08 mg/L AgNPs filtrate; Ag<sup>+</sup>: 0.004 mg/L Ag<sup>+</sup>; AgNPs + cys(all): 0.08 mg/L AgNPs +0.09 mg/L cys; Cys: 0.09 mg/L cys; AgNPs + cys(part): 0.08 mg/L AgNPs + 0.0045 mg/L cys) Data represent the mean  $\pm$  SD ( $n = 5$ ). Data with same letters were not significantly different ( $p = 0.05$ ).
